# Supplementary material
Source: bioRxiv or medRxiv preprint supplement (http://biorxiv.org/highwire/filestream/133573/field_highwire_adjunct_files/3/319723-12.pdf)

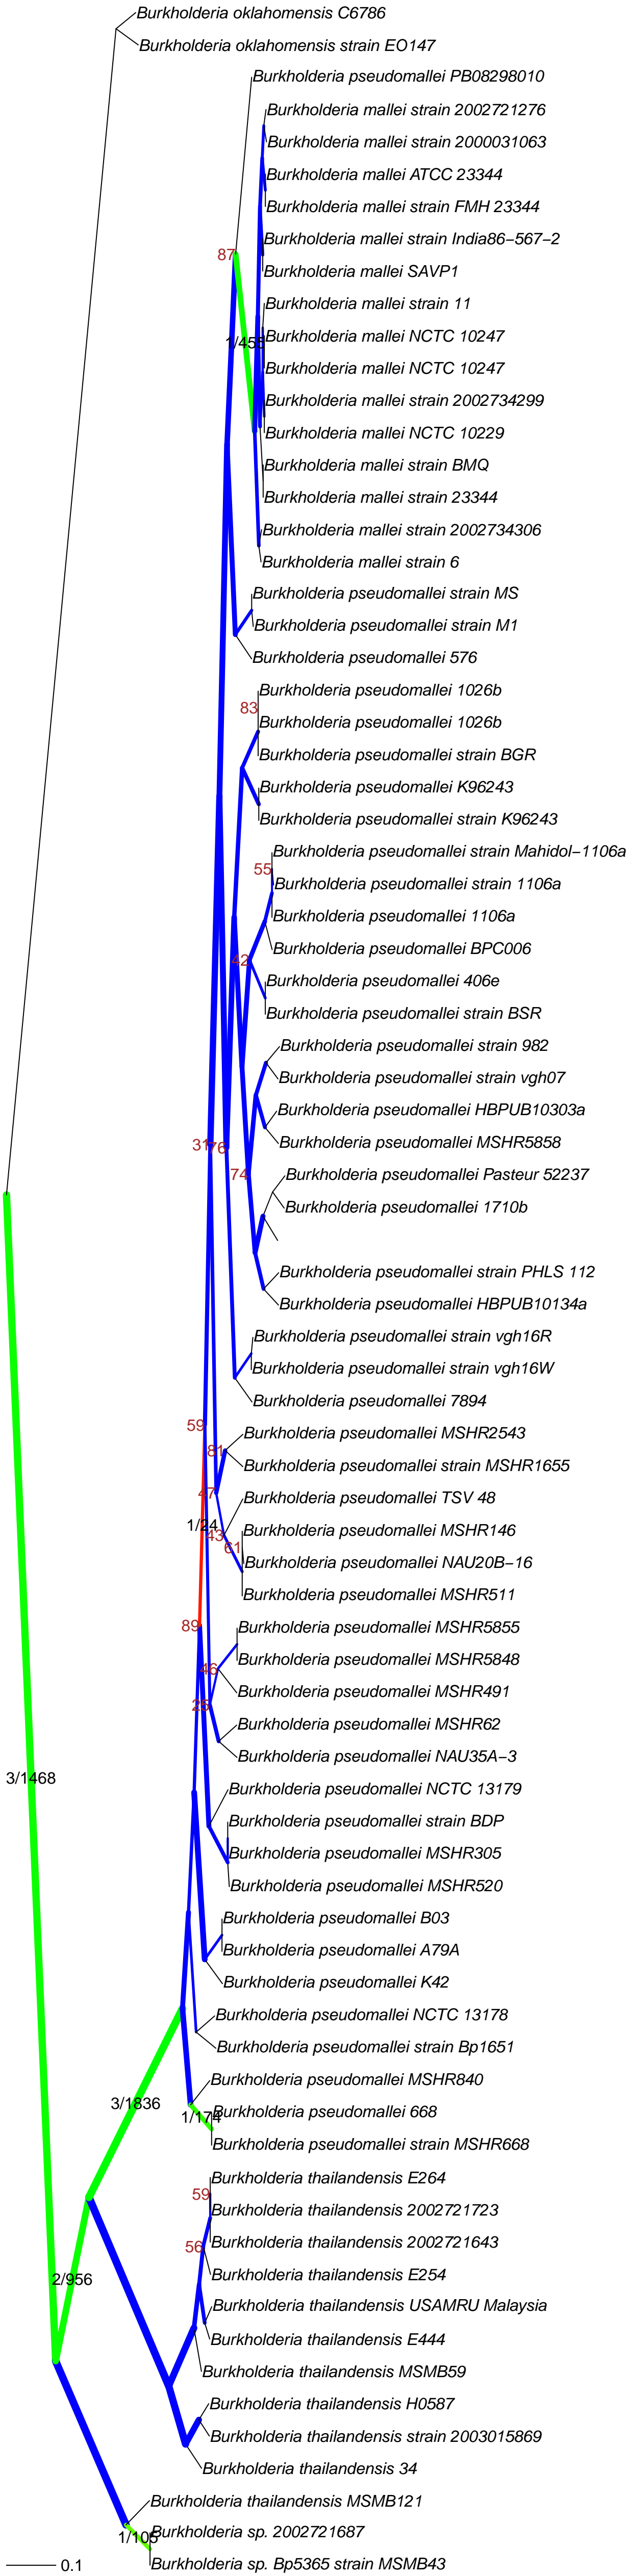

Supplement: Supplementary file [file 319723-12.pdf]
